# Supplementary material
Source: publisher figshare collection journal article supplement (https://frontiersin.figshare.com/ndownloader/files/13267400)
Supplement: Supplementary file 1 [file 13267400]

# Appendix

**Methodological approaches to mangrove valuation: Where do we stand?**

Amber Himes-Cornell1,2,*, Susan O. Grose1 and Linwood Pendleton1,3

1 University of Brest, Ifremer, CNRS, UMR 6308, AMURE, IUEM, 29280, Plouzane, France

2 UN Food and Agriculture Organization, Fisheries and Aquaculture Division, Rome, Italy

3 World Wildlife Fund, Global Science, Washington, D.C., USA

Table A1. Ecosystem service values in US$ per ha per year for mangrove ecosystems.

| **Ecosystem service** | **Example values (per ha per year)** |
| --- | --- |
| Food | Benefit transfer: US$5.75 (Witt, 2016), US$ 90 (Khaleel, 2012; Khaleel et al., 2009), US$212 (Ayanlade and Proske, 2015), US$418.07-776.40 (Clark et al., 2012), US$450 (Ullah et al., 2010), US$577-980.18 (Burgess et al., 2015) US$797 (Gunawardena, 2009), US$1,225 (Mendoza-Gonzalez et al., 2012), US$8,700 (Souza and Silva, 2011), US$23,613 (Mubarak Bin Daina et al., 2015)  Production function: US$52-105 (Islam and Ikejima, 2010), US$18,849 (Vazquez-Gonzalez et al., 2015), US$126,444 (Pascal and Bulu, 2013)  Market price: US$37 (Malik et al., 2015a), US$48.8 (Hoberg, 2011), $US49 (Giri et al., 2011; Samonte-Tan et al., 2007), US$97.90 (Janekarnkij, 2010), US$113.09 (Kairo et al., 2009), US$238 (Huxham et al., 2015), US$385-419 (Kuenzer and Tuan, 2013), US$560.55 (Otieno, 2015) |
| Water | Benefit transfer: US$212 (Ayanlade and Proske, 2015), US$1,385-6,716 (Mubarak Bin Daina et al., 2015) |
| Raw material | Benefit transfer: US$1.45 (Mendoza-Gonzalez et al., 2012), US$45.30 (Emerton and Aung, 2013), US$50 (Khaleel, 2012; Khaleel et al., 2009), US$79.50 (Interwies and Gorlitz, 2013), US$101 (Barbier, 2012b), US$110 (Ullah et al., 2010), US$212 (Ayanlade and Proske, 2015)  Production function: US$151 (Witt, 2016), US$5,100 (Christensen et al., 2008), US$1,336-9201 (Kallesoe et al., 2008), US$39,233 (Pascal and Bulu, 2013)  Market price: US$12 (Malik et al., 2015b), US$30.50 (Janekarnkij, 2010), US$35.70 (Hoberg, 2011), US$41.54 (Otieno, 2015), US$206 (Huxham et al., 2015), US$2,040 (Vo, 2013) |
| Waste treatment | Benefit transfer: US$30.80 (Interwies and Gorlitz, 2013), US$569 (Mendoza-González et al., 2012), US$660 (Khaleel, 2012)US$760 (Ullah et al., 2010), US$6,696 (Gunawardena, 2009), US$11,000 (Korovulavula et al., 2008)  Replacement cost: US$72 (Souza and Silva, 2011) |
| Climate regulation | Benefit transfer: US$2.20 (Janekarnkij, 2010), US$186 (Ayanlade and Proske, 2015), US$219 (Quoc Vo et al., 2015), US$59-6,538 (Kuenzer and Tuan, 2013), US$1,100 (Ullah et al., 2010)  Market price: US$30.50 (Barbier et al., 2011), US$44.42 (Kairo et al., 2009), US$126 (Hoberg, 2011), US$251 (Huxham et al., 2015), US$550-1,100 (Malik et al., 2015b)  Production function: US$414,411 (Pascal and Bulu, 2013)  Social cost of carbon: No per ha per year estimates published. |
| Erosion prevention | Benefit transfer: US$38.25 (Janekarnkij, 2010), US$186 (Ayanlade and Proske, 2015), US$672 (Samonte-Tan et al., 2007), US$800 (Khaleel, 2012), US$973.95 (Emerton and Aung, 2013) US$1200 (Ullah et al., 2010), US$1,340.60 (Interwies and Gorlitz, 2013)  Market price: US$395 (Huxham et al., 2015), US$660 (Quoc Vo et al., 2015), US$3,896 (Kuenzer and Tuan, 2013) |
| Moderation of extreme events | Benefit transfer: US$16 (Janekarnkij, 2010), US$40 (Ullah et al., 2010), US$639.35 (Emerton and Aung, 2013), US$1,340 (Interwies and Gorlitz, 2013), US$1,356.66-1,631 (Burgess et al., 2015)US$1,500 (Khaleel, 2012), US$1,839 (Gunawardena, 2009), US$2,000 (Ullah et al., 2010), US$3,116 (Mubarak Bin Daina et al., 2015)  Replacement cost: US$35 (Huxham et al., 2015), US$660 (Quoc Vo et al., 2015), US$694-3,767 (Malik et al., 2015b), US$1,879 (Barbier, 2012b)  Avoided cost: US$91.70 (Hoberg, 2011) |
| Maintenance of soil fertility and nutrient cycling | Benefit transfer: US$640 (Khaleel, 2012; Ullah et al., 2010) |
| Regulation of water flows | Benefit transfer: US$540 (Ullah et al., 2010), US$660 (Khaleel, 2012) |
| Maintenance of genetic diversity | Benefit transfer: US$2.43 (Witt, 2016), US$5 (Hoberg, 2011), US$19 (Samonte-Tan et al., 2007), US$100 (Ullah et al., 2010), US$168 (Ayanlade and Proske, 2015), US$200 (Khaleel, 2012; Khaleel et al., 2009) |
| Maintenance of life cycles of migratory species | Benefit transfer: US$117.14 (Janekarnkij, 2010), US$243 (Samonte-Tan et al., 2007)US$249 (Barbier, 2012b), US$425.60 (Interwies and Gorlitz, 2013), US$3,500 (Ullah et al., 2010), US$4,200 (Khaleel, 2012; Khaleel et al., 2009)  Production function: US$995-4,887 (Kallesoe et al., 2008), US$2,124 (Kuenzer and Tuan, 2013)  Market price: No per ha per year estimates published. |
| Aesthetic information | Benefit transfer: US$500 (Khaleel, 2012; Khaleel et al., 2009) |
| Information for cognitive development | Benefit transfer: US$50 (Ullah et al., 2010), US$100 (Khaleel, 2012)  Market price: US$184.40 (Hoberg, 2011), US$770.23 (Kairo et al., 2009) |
| Opportunities for recreation and tourism | Benefit transfer: US$20 (Ayanlade and Proske, 2015), US$155 (Mendoza-González et al., 2012) US$500 (Khaleel, 2012; Ullah et al., 2010), US$658 (Gunawardena, 2009), US$37,927 (Mubarak Bin Daina et al., 2015)  Market price: US$9.30 (Kairo et al., 2009), US$453.20 (Janekarnkij, 2010), US$ 2,352.15 (Souza and Silva, 2011)  Contingent valuation: US$97 (Dehghani et al., 2010)  Travel cost method: US$2,960.44-4,597.71 (Kuenzer and Tuan, 2013) |

## Table A2. Summary of ecosystem service values published for mangroves.

| **Year values were calculated for** | **Unknown** | **1996** | **1998** | **1999** | **2001** | **2002** | **2003** | **2004** | **2005** | **2006** |
| --- | --- | --- | --- | --- | --- | --- | --- | --- | --- | --- |
| **Total ES value** | US$11,850/ha/yr (Ullah et al. 2010), VND146,700/household/year (Tuan et al. 2014); US$10,960/ha/yr (Khaleel et al. 2009; 2012) | US$18,978/ha (Barbier 2012) |  |  |  |  | US$757.55/ha/yr (Janekarnkij 2010) |  |  | 1852.60 million PhP/ha (Padilla 2008) |
| **Provisioning services** | US$4800/ha/yr (Korovulavula et al. 2008) |  |  |  |  |  |  |  |  |  |
| **Food** | Aquatic production: US$300/ha/yr, Fishing: US$150/ha/yr (Ullah et al. 2010); Fisheries productivity: US$25,149(+-1,395 SE)/km (Aburto-Oropeza et al. 2008), Drinking water, food and raw materials: US$212/ha/yr (Ayanlade et al. 2015), Fisheries: $23,613/ha/yr (Mubarak Bin Daina et al. 2015), Fisheries: RM432.75 /household/month (Mojiol et al. 2016); Mud-crab fishing: US$5.75/ha/yr (Witt 2016); Fisheries: 0.02 million €/km²/year (Failler et al. 2015); Fisheries: US$37/ha/yr (Malik et al. 2015); Aquaculture: US$ 8,700 / ha / year (Souza and Silva 2015); Fisheries: US$44.62-68.6/household/year, Honey: US$3.6/household/year (Hussain and Badola 2010); Fishing: US$ 90/ha/yr (Khaleel et al. 2009; 2012); Food production/biological control: US$797/ha/yr (Gunawardena 2009); Mudcrabs: IDR 81,811,800/yr, Fish: IDR 440,000/yr (Susilo et al. 2016) |  |  |  | Fish: US$200,000 /yr, Crab: US$20,000/yr, Honey and wax: US$15,000/yr (2001-2010 average, Uddin et al. 2013) |  | Fisheries: US$97.9/ha/year (Janekarnkij 2010); Commercial, recreational, and subsistence fisheries harvest: $418.07 to $776.40 per ha (Clark et al. 2012) | Fisheries: US$52-105/ha/yr (Islam and Ikejima 2010); Fisheries: US$16/ha/yr, Mollusks/Echinoderms: US$33/ha/yr (Samonte-Tan et al. 2007) |  | Fisheries: 68,436.15 PhP/km2/yr (Padilla 2008), Commercial and subsistence fisheries: US$7119.51/household/yr (O’Garra 2012); Fin fish: US$113.09/ha/yr (Kairo et al. 2009); Food production: US$1225/ha/yr (Mendoza-González et al. 2012) |
| **Water** | Drinking water, food and raw materials: US$212/ha/yr (Ayanlade et al. 2015), Water purification: US$ 1385-$6716 ha/yr (Mubarak Bin Daina et al. 2015) |  |  |  |  |  |  |  |  |  |
| **Ornamental resources** |  |  |  |  |  |  |  |  |  |  |
| **Genetic resources** |  |  |  |  |  |  |  |  |  |  |
| **Medicinal resources** | Spiritual, medical and recreational benefits: US$20/ha/yr (Ayanlade et al. 2015) |  |  |  |  |  | Raw material (incl. medicinal plants): US$30.5/ha/year (Janekarnkij 2010) |  |  |  |
| **Raw material** | Livestock grazing: US$60/ha/yr, Fertilizer industry: US$50/ha/yr (Ullah et al. 2010), Drinking water, food and raw materials: US$212/ha/yr (Ayanlade et al. 2015), Timber products: RM40.85 /household/month (Mojiol et al. 2016); Beekeeping: US$0.88/ha/yr, Sustainable timber harvesting: US$0.50/ha/yr, Charcoal production: US$150/ha/yr (Witt 2016); Firewood: US$2/ha/yr, Charcoal: US$5/ha/yr, Nypa palm crafting valule: US$5/ha/yr (Malik et al. 2015); Fuelwood: US$88.34, Timber: US$20.1/household/year, Thatching material: US$2.5/household/year (Hussain and Badola 2010); Fertilizer industry: US$50/ha/yr (Khaleel et al. 2009; 2012); Total gross mangrove product (Sri Lanka): US$1,771/household/yr and US$9,201/ha/yr,  Total gross mangrove product (Thailand): US$9443-14428/household/yr and US$1336-3306/ha/yr (Kallesoe et al. 2008) | Wood and non-wood products: US$101/ha/yr (Barbier 2012) | Forestry products: US$5,100/ha/yr (1998-2001 average, Christensen et al. 2008) |  | Timber: US$400,000/yr,  Thatching materials: US$60,000/yr, Fuel wood: US$60,000/yr (2001-2010 average, Uddin et al. 2013) |  | Raw material (incl. medicinal plants): US$30.5/ha/year (Janekarnkij 2010); Timber and building material provisions: $89.59 to $101.42 per ha (Clark et al. 2012) |  |  | Timber: 279,770.44 PhP/km2/yr (Padilla 2008); Poles: US$4,328.27/ha of the plantation, Fuelwood: US$222.07/ha of the plantation (Kairo et al. 2009); Raw materials: US$1.45/ha/yr (Mendoza-González et al. 2012) |
| **Regulating services** |  |  |  |  |  |  |  |  |  |  |
| **Waste treatment** | Pollution filtration: US$260/ha/yr  Heavy metal removal: US$150/ha/yr, Chemical pollution absorption: US$350/ha/yr (Ullah et al. 2010); Water and waste treatment: 0.17 M €/km²/year (Failler et al. 2015); Wastewater treatment: US$ 72.00/ha/year (Souza and Silva 2011); Pollution filtration: US$260/ha/yr, Heavy metal removal: US$100/ha/yr, Chemical pollution absorption: US$300/ha/yr (Khaleel et al. 2009; 2012); US$66,960/km /yr (in 1994 US$) or US$11,000/ha/yr (Korovulavula et al. 2008); US$6696/ha/yr (Gunawardena 2009) |  |  |  |  |  |  |  |  | 53.83 million PhP/yr (Padilla 2008); $569/ha/yr(Mendoza-González et al. 2012) |
| **Moderation of extreme events** | Protection against cyclone and wave damage: US$2000/ha/yr (Ullah et al. 2010), Coastal protection: $3,116/ha/yr (Mubarak Bin Daina et al. 2015); Coastal protection: 0.06 million €/km²/year (Failler et al. 2015); Coastline protection: US$694-3767/ha/yr (Malik et al. 2015); Protection against Tsunami and wave damage: US$1500/ha/yr (Khaleel et al. 2009; 2012); Coastal protection: US$1839/ha/yr (Gunawardena 2009); Wave breakers: IDR 93,699,170/yr; Abrasion breakers: IDR 26,364,2000/yr (Susilo et al. 2016) | Storm protection: US$134,801/ha (Barbier 2007), Coastal protection: US$1879/ha/year (Barbier 2012) |  | Wind protection: US$177/ha (Das and Crepin 2013) |  |  | Storm protection: US$16/ha/yr (Janekarnkij 2010) |  | Erosion control and Storm protection: 23,210.74 PhP/ha/yr (Defiesta 2007) | Coastal protection: 40,000PhP/ha/yr (Padilla 2008); Coastal protection: US$95686.63/km/yr (O’Garra 2012) |
| **Regulation of water flows** | Flood control: US$500/ha/yr, Groundwater and recharge supply: US$40/ha/yr (Ullah et al. 2010); Seawater intrusion prevention: US$277/ha/yr (Malik et al. 2015), Flood control: US$600/ha/yr; Groundwater and recharge supply: US$60/ha/yr (Khaleel et al. 2009; 2012) |  |  |  |  |  |  |  |  |  |
| **Erosion prevention** | US$1200/ha/yr (Ullah et al. 2010), Erosion and climate control: US$186/ha/yr (Ayanlade et al. 2015); US$800/ha/yr (Khaleel et al. 2009; 2012); Shoreline protection: 1) US$170,100 per km of shoreline per yr (in 1994 US$) or 2) F$105 million total protection value (Korovulavula et al. 2008) |  |  |  |  |  | US$38.25 /ha/yr (Janekarnkij 2010); $597.24 to $1,791.71 per ha (Clark et al. 2010) | US$672/ha/yr (Samonte-Tan et al. 2007) | Erosion control and Storm protection: 23,210.74 PhP/ha/yr (Defiesta 2007) |  |
| **Climate regulation** | Microclimate regulation: US$1000/ha/yr  World climate regulation: US$100/ha/yr (Ullah et al. 2010), Erosion and climate control: US$186/ha/yr (Ayanlade et al. 2015); Carbon sequestration: 0.01 M €/km²/year (Failler et al. 2015); Carbon sequestration:US$550-1100/ha/yr (Malik et al. 2015); Microclimate regulation: US$800/ha/yr, World climate regulation: US$100/ha/yr (Khaleel et al. 2009; 2012) |  |  |  |  | Forestation cost (C fixation): 16,963,200 CNY/year; Carbon tax: 80,723,300 CNY/year (Zhiyun et al. 2011) | Carbon sequestration: US$2.2/ha/yr (Janekarnkij 2010) |  |  | Carbon sequestration: US$10.7/ton (Padilla 2008) ; US$44.42/ha/yr (Kairo et al. 2009) |
| **Maintenance of soil fertility** | Ecosystem function in terms of dry matter: US$150 /ha/yr, Oxygen production (20 kg/ha): US$ 40/ha/yr, Nutrient production and recycling: US$450/ha/yr (Ullah et al. 2010), Protection of biodiversity, genetic resources, nutrient cycling: US$168/ha/yr (Ayanlade et al. 2015); Nutrient cycling: US$854.68/ha (Hussain and Badola 2008); Ecosystem function in terms of dry matter: US$150/ha/yr, Oxygen production (20 kg/ha/yr): US$40/ha/yr, Nutrient production and recycling: US$450/ha/yr (Khaleel et al. 2009; 2012; 2012) |  |  |  |  |  |  |  | Litterfall function: 13,515.47 PhP/ha/yr (Defiesta 2007) |  |
| **Pollination** |  |  |  |  |  |  |  |  |  |  |
| **Biological control** | Food production/biological control: US$797/ha/yr (Gunawardena 2009) |  |  |  |  |  |  |  |  |  |
| **Supporting services** |  |  |  |  |  |  |  |  |  |  |
| **Maintenance of life cycles of migratory species** | Fish and shellfish habitat: US$2500/ha/yr, Waterfowl and other birds' habitat: US$1000/ha/yr (Ullah et al. 2010), Nursery habitat: NPV: US$0.47 and 0.57 million (3.44-18 km2 ha range) (Barbier 2007); Fisheries biomass production (nursery ground): 0.07 M /km²/year (Failler et al. 2015); Provision of nursery grounds: US$2292/ha/yr (Malik et al. 2015); Fish and shellfish habitat: US$2000/ha/yr; Waterfowl and other birds' habitat: US$1200/ha/yr, Wildlife habitat: US$1000/ha/yr (Khaleel et al. 2009; 2012); Nursery value (Thailand): US$995-4,887/ha/yr (Kallesoe et al. 2008); Nursery ground: IDR 116,065,005 (Susilo et al. 2016) | Habitat-fishery linkanges: US$249/ha/yr (Barbier 2012) |  |  |  |  | Nursery function: US$117.14/ha/year (Janekarnkij 2010); Habitat function: $331 per ha (Clark et al. 2012) | Nursery function: US$243/ha/yr (Samonte-Tan et al. 2007) | Nursery function: 36,955.16 PhP/ha/yr (Defiesta 2007) |  |
| **Maintenance of genetic diversity** | Preservation of gene pool: US$100/ha/yr (Ullah et al. 2010), Protection of biodiversity, genetic resources, nutrient cycling: US$168/ha/yr (Ayanlade et al. 2015); Biodiversity: US$2.43/ha/yr (Witt 2016); Preservation of gene pool: US$200/ha/yr (Khaleel et al. 2009; 2012) |  |  |  |  |  |  | US$19/ha/yr (Samonte-Tan et al. 2007) |  |  |
| **Cultural services** |  |  |  |  |  |  |  |  |  |  |
| **Aesthetic information** | Recreation and aesthetics: US$500/ha/yr (Khaleel et al. 2009; 2012) |  |  |  |  |  |  |  |  |  |
| **Spiritual experience** | US$20/ha/yr (Ayanlade et al. 2015) |  |  |  |  |  |  |  |  |  |
| **Opportunities for recreation and tourism** | Recreation and aesthetics: US$500/ha/yr (Ullah et al. 2010), Recreation: RM41.18 per visit (Ahmad 2009), Spiritual, medical and recreational benefits: US$20/ha/yr (Ayanlade et al. 2015), Recreation and tourism: $37,927/ha/yr (Mubarak Bin Daina et al. 2015); Ecotourism: 0.27 million €/km²/year, Touring activities: 0.13 million €/km²/year, Consumer surplus for recreational activities: 0.98 million €/km²/year (Failler et al. 2015); Tourism (including education and research): US$2352.15/ha/yr (Souza and Silva 2011); Recreation and aesthetics: US$500/ha/yr (Khaleel et al. 2009; 2012); Recreation: US$658/ha/yr (Gunawardena 2009); Tourism: Rs 25,000 in consumer surplus/person/year (Amarnath and Mouna 2016) |  |  |  | Tourism: US$42,000/yr (2001-2010 average, Uddin et al. 2013) |  | Ecotourism and recreation: US$453.2/ha/yr (Janekarnkij 2010); Recreation: $358.34 per ha (Clark et al. 2012) |  |  | Recreation value: US$97 ha/yr (Dehghani et al. 2010); Ecotourism: US$9.30/ha/yr (Kairo et al. 2009); Recreation: US$155/ha/yr (Mendoza-González et al. 2012) |
| **Inspiration for culture, art and design** | Spiritual, medical and recreational benefits: US$20/ha/yr (Ayanlade et al. 2015) |  |  |  |  |  |  |  |  |  |
| **Information for cognitive development** | Scientific research: US$50/ha/yr (Ullah et al. 2010); Research and education: 0.01 M €/km²/year (Failler et al. 2015); Scientific research: US$100/ha/yr (Khaleel et al. 2009; 2012) |  |  |  |  |  |  |  |  | Education and research: 7.5 million PhP/yr (Padilla 2008); US$770.23/ha/yr (Kairo et al. 2009) |
| **Existence/ option/ bequest value** | Existence value: US$1.65/ha/yr (Witt 2016); Bequest and existence value: 0.15 M €/km²/year (Failler et al. 2015); Option value for future medicinal use: US$157/ha/yr (Malik et al. 2015) |  |  |  |  |  | Non-use value: US$2.40/ha/yr (Janekarnkij 2010) |  |  | Bequest value: US$106.92/household/year (O’Garra 2012) |

| **Year values were calculated for** | **2007** | **2008** | **2009** | **2010** | **2011** | **2012** | **2013** | **2014** | **2015** |
| --- | --- | --- | --- | --- | --- | --- | --- | --- | --- |
| **Total ES value** | US$2,870 /ha/yr (Pernetta et al. 2013) ; $US4,684.20/ha/yr lost value of mangroves (all services) across the region (Eppink et al. 2014); Total ecosystem service value: US$1258/ha/year (Camacho Valdez et al. 2014); All ecosystem services combined  all of SE Asia: US$1,037.46/ha/yr, Brunei: US$4000.00ha/yr, Cambodia: US$500.00ha/yr, Indonesia: US$1043.48ha/yr, Malaysia: US$1268.18ha/yr, Myanmar: US$625.00ha/yr, Philippines: US$1833.33ha/yr, Thailand: US$1440.00ha/yr, Vietnam: US$533.33ha/yr, (Brander et al. 2012) |  | US$797/ha/yr (Pandey 2015) | US$3000/ha/yr (Quoc Vo et al. 2015) |  | $2,692/ha/yr (2012 international $) (Clavelle and Jylkka 2013) | US$17,426 /ac/year (Brown and Shi 2014) |  |  |
| **Provisioning services** |  |  |  |  |  | Extractive value: Tk 2,300/ha/yr (Chow 2015) |  |  |  |
| **Food** | Fruit: US$1/ha/yr, Fisheries: US$514/ha/yr, Worms: US$41/ha/yr, Wildlife: US$18/ha/yr (Pernetta et al. 2013); Commercial fisheries: US$18,849/ha/year (Vazquez-Gonzalez et al. 2015); Fisheries: US$1,287/ha/yr (Adhikari 2010) | Mangrove and coral reef fisheries: SBD$ 5500-12 100/household/yr (Warren-Rhodes et al. 2011) |  | Fisheries: US$44/ha/yr, Aquaculture: US$ 4.8/ha/yr ( Hoberg 2011); Commercial fisheries: 70kMGA: 6180 MGA/individual; 80k MGA: 14050 MGA/individual (Oleson et al. 2015); Fisheries: Range US$990.96 (less than 30% mangrove cover)-US$3248.14 (over 70% mangrove cover) (Quoc Vo et al. 2015); Fisheries: US$577-960.18ha/yr (Burgess et al. 2015); Fisheries: US$3404/household/year (Adekola et al. 2015) | Fisheries catch inside mangrove area: US$385.97-419.11/ha/yr (Kuenzer and Tuan 2013) | Subsistence fishery: US$ 79161/ha/yr; Int$US1311, Commercial fishery: US$ 47283/ha/yr; Int$US783 (Pascal and Bulu 2013) | Fish: US$ 559 /Ha/year, Honey: US$ 1.55 /ha/year (Otieno 2015), Food: 40.58 million Indian rupees/yr: 719.5 Indian rupees/ha/yr (Everard et al. 2014) | Capture fisheries - finfish: US$109/ha/yr, crustaceans: US$129/ha/yr (Huxham et al. 2015);  Willingness to accept mangrove conservation with a decrease in fishing from 15 kg/day to 5-15 kg/day or less than 5 kg/day: 123260-184400IRR/household/day or US$4.47-6.68/household/day (Mashayekhi et al. 2016); Fishing: US$2,793.13-5,504.22/household/yr  Snails: US$72.28/household/yr (Sopheak and Hoeurn 2016) | Fisheries: 10-year NPV per hectare ranging from $0-$3,839 /ha (Atkinson et al. 2016) |
| **Water** |  |  |  |  |  |  | Fresh drinking water: 2.72 million Indian rupees/yr: 482 Indian rupees/ha/yr (Everard et al. 2014) |  |  |
| **Ornamental resources** |  |  |  |  |  |  |  |  |  |
| **Genetic resources** |  |  |  |  |  |  |  |  |  |
| **Medicinal resources** | Medicine: US$173/ha/yr (Pernetta et al. 2013) |  |  |  |  |  |  |  |  |
| **Raw material** | Timber: US$73/ha/yr, Firewood: US$2/ha/yr (Pernetta et al. 2013) | SBD$ 2500-10 /household/yr (Warren-Rhodes et al. 2011) |  | US$3714/household/year (Adekola et al. 2015); US$ 4.2/ha/yr for timber, US$16.8/ha/yr for fuelwood, Apiculture: US$14.7/ha/yr (Hoberg 2011); Timber products: US$2040/ha/yr (Quoc Vo et al. 2015) | Wood raw material: US$2,765/ha/yr (Ajonina et al. 2014) | Raw materials: Non-timber, non-fish (NTNF) mangrove products: MMK44,000/ha/yr: US$45.30 /ha/yr (Emerton and Aung 2013); timber forestry product: U$12/ha/year; non-timber forestry product: US$67.5/ha/year (Interweis and Gorlitz 2013); Wood extraction: US$ 39233/ha/yr; Int$US650 (Pascal and Bulu 2013) | Firewood: US$26.60 /ha/year, Building materials: US$14.94 /ha/year (Otieno 2015), Timber and fuel wood collection: 3,544.74 Baht/Household/Year  Plan and herb collection: 4,704.62 Baht/Household/Year (Wiwatthanapornachai et al. 2014) | Natural regeneration after clear felling - profitability: $US369.91/ha (Aziz et al. 2015); Timber, fuelwood, honey: US$206/ha/yr (Huxham et al. 2015); Willingness to accept mangrove conservation with a decrease in mangrove wood collection from 10 bundles/trip to 5 bundles or 3 bundles/trip: 103924-116602 IRR/household/day or US$3.77-4.23/household/day (Mashayekhi et al. 2016); Fuelwood: US$54.81-98.02/household/yr,  Poles for construction materials: US$615.37/household/yr (Sopheak and Hoeurn 2016) |  |
| **Regulating services** |  |  |  |  |  |  |  |  |  |
| **Waste treatment** |  |  |  |  |  | US$30.80/ha/year (Interweis and Gorlitz 2013) | 8,819.89 Baht/Household/Year (Wiwatthanapornachai et al. 2014); Industrial and domestic wastewater treatment value: 119.57 million Indian rupees/yr: 21,200.35 Indian rupees/ha/yr (Everard et al. 2014) |  |  |
| **Moderation of extreme events** | Coastal protection: US$444/ha/yr, Windbreak: US$7/ha/yr (Pernetta et al. 2013) |  |  | Shoreline protection: US$91.7/ha/yr (Hoberg 2011); 1x4 yrs: 4130 MGA/individual; 1x/5 yrs: 14990 MGA/individual (Oleson et al. 2015); Storm protection/erosion: US$660/ha/yr (Quoc Vo et al. 2015); Coastal protection: US$1,356.66-1,631ha/yr (Burgess et al. 2015) |  | Disturbance regulation: NZ$4,909.81/ha/yr (Patterson and Cole 2013); Coastal protection: MMK 621,000/ha/yr: US$639.35 /ha/yr (Emerton and Aung 2013); Moderation of extreme events and Erosion prevention: US$1340.60/ha/year (Interweis and Gorlitz 2013); Coastal protection against floods: US$ 5644/ha/yr; Int$US93 (Pascal and Bulu 2013) | Coastal protection: 11,490.39 Baht/Household/Year (Wiwatthanapornachai et al. 2014), flood control: 348.40 million Indian rupees/yr: 61,773.05 Indian rupees/ha/yr (Everard et al. 2014) | Protection from storm surges: US$35/ha/yr (Huxham et al. 2015) | Coastal protection: $88-$6.1M/ha over 10 years (Atkinson et al. 2016) |
| **Regulation of water flows** |  |  |  |  |  |  |  |  |  |
| **Erosion prevention** | Sediment retention: US$66/ha/yr (Pernetta et al. 2013) |  |  | Storm protection/erosion: US$660/ha/yr (Quoc Vo et al. 2015) | US$3896/ha/yr (Kuenzer and Tuan 2013) | MMK 946,000/ha/yr: US$973.95 /ha/yr (Emerton and Aung 2013); Moderation of extreme events and Erosion prevention: US$1340.60/ha/year (Interweis and Gorlitz 2013) |  | Protection from coastal erosion: US$395/ha/yr (Huxham et al. 2015) |  |
| **Climate regulation** | Carbon sequestration: US$89/ha/yr (Pernetta et al. 2013) |  | Permanent carbon sequestration by global mangroves: $30.50/ha/yr (Barbier et al. 2011) | Carbon sequestration: mean estimate: social cost of carbon US$464,000/ha, marginal abatement cost US$950,000/ha, market price US$252/ha (Jerath 2012); US$ 126/ha/yr (Hoberg 2011); US$219/ha/yr (Quoc Vo et al. 2015) | Carbon sequestration: US$59.55-6538.79/ha/yr (Kuenzer and Tuan 2013) | US$335.50/ha/year (Interweis and Gorlitz 2013); Carbon sequestration: US$ 414411/ha/yr; Int$US6864 (Pascal and Bulu 2013) | Purify air pollution: 6,093.90 Baht/Household/Year, Carbon storage: 5,773.76 Baht/Household/Year (Wiwatthanapornachai et al. 2014); Carbon sequestration: 0.56 million Indian rupees/yr: 99.29 Indian rupees/ha/yr (Everard et al. 2014) | Carbon sequestration: US$251/ha/yr (Huxham et al. 2015) | Social cost of carbon: $56,045/ha, Regional Greenhouse Gas Initiative market: $6041/ha, International voluntary market price: $4819/ha,  Marginal abatement cost of carbon: $18793.60/ha (Jerath et al. 2016) |
| **Maintenance of soil fertility** | Oxygen production: US$3/ha/yr (Pernetta et al. 2013) |  |  |  |  |  | Nutrient storage: 7,510.48 Baht/Household/Year (Wiwatthanapornachai et al. 2014) |  |  |
| **Pollination** |  |  |  |  |  |  |  |  |  |
| **Biological control** |  |  |  |  |  |  |  |  |  |
| **Supporting services** |  |  |  |  |  |  |  |  |  |
| **Maintenance of life cycles of migratory species** | Nursery function: US$573/ha/yr (Pernetta et al. 2013) |  |  |  | Nursery value: US$2124/ha/yr (Kuenzer and Tuan 2013) | Refugia: NZ$413.46/ha/yr (Patterson and Cole 2013); Fisheries nursery and breeding habitat: MMK 1097574/ha/yr: US$1,130 /ha/yr (Emerton and Aung 2013); nursery grounds for fish: US$ 425.60/ha/year (Interweis and Gorlitz 2013) | Nursery and food habitat of aquatic animals: 7,294.07 Baht/Household/Year  Benthos, habitat: 10,844.13 Baht/Household/Year (Wiwatthanapornachai et al. 2014) | Nursery habitat: US$44.82/household/yr (Sopheak and Hoeurn 2016) |  |
| **Maintenance of genetic diversity** |  |  |  | US$5/ha/yr (Hoberg 2011) |  |  | Genetic diversity/Biodiversity source: 7,539.21 Baht/Household/Year (Wiwatthanapornachai et al. 2014) |  |  |
| **Cultural services** |  |  |  |  |  |  |  | Cultural services (tourism, education, research): US$41/ha/yr (Huxham et al. 2015) |  |
| **Aesthetic information** | Aesthetic value: US$11/ha/yr (Pernetta et al. 2013) |  |  |  |  |  |  |  |  |
| **Spiritual experience** |  |  |  |  |  |  |  |  |  |
| **Opportunities for recreation and tourism** | Ecotourism: US$43/ha/yr (Pernetta et al. 2013) |  |  | Recreation: US$-133ha/yr (Burgess et al. 2015) | Tourism: US$2960.44-4597.71/ha/yr (Kuenzer and Tuan 2013); 24,000 Ghanian cedis (US$16,000)/yr: US$160/ha/yr (Ajonina et al. 2014) |  | Recreation: 4,512.39 Baht/Household/Year  Bird watching: 5,714.11 Baht/Household/Year (Wiwatthanapornachai et al. 2014); Recreation: 3.79 million Indian rupees/yr: 671.96 Indian rupees/ha/yr (Everard et al. 2014) | Willingness to accept mangrove conservation with no recreational boating: 234375 IRR/household/day or US$8.50/household/day (Mashayekhi et al. 2016) |  |
| **Spiritual experience** |  |  |  |  |  |  |  |  |  |
| **Inspiration for culture, art and design** |  |  |  | Social cohesion: 4 people/village: 3070 MGA/individual; 6 people/village: 14990 MGA/individual (Oleson et al. 2015) |  |  |  |  |  |
| **Information for cognitive development** |  |  |  | Research and education: US$ 184.4 /ha/yr (Hoberg 2011) |  |  | Natural education: 8,843.15 Baht/Household/Year (Wiwatthanapornachai et al. 2014) |  |  |
| **Existence/ option/ bequest value** | Option value: US$51/ha/yr (Pernetta et al. 2013) |  |  | Existence value: US$ 70.2 /ha/yr (Hoberg 2011); Bequest value: 2 generations: 24420 MGA/individual; 5 generations: 56780 MGA/individual (Oleson et al. 2015) |  |  | National heritage: 11,317.94 Baht/Household/Year (Wiwatthanapornachai et al. 2014) |  |  |

# References included in systematic literature review

Aburto-Oropeza, O., Ezcurra, E., Danemann, G., Valdez, V., Murray, J., & Sala, E. (2008). Mangroves in the Gulf of California increase fishery yields. *Proceedings of the National Academy of Sciences*, 105(30), 10456-10459.

Adekola, O., Mitchell, G., & Grainger, A. (2015). Inequality and ecosystem services: The value and social distribution of Niger Delta wetland services. *Ecosystem Services*, 12, 42–54.

Adhikari, B., Baig, S. P., & Iftikhar, U. A. (2010). The Use and Management of Mangrove Ecosystems in Pakistan. *Journal of Environment & Development*, 19(4), 446–467.

Ahmad, S. (2009). Recreational values of mangrove forest in Larut Matang, Perak. *Journal of Tropical Forest Science*, 81-87.

Ajonina, G., Agardy, T., Lau, W., Agbogah, K., & Gormery, B. (2014). Mangrove conditions as indicator for potential payment for ecosystems services in some esturines of Western Region of Ghana, West Africa. In *The land/ocean interactions in the coastal zone of west and central Africa* (pp. 151–166). Springer International Publishing.

Amarnath, J. S., & Mouna, A. (2016). Environmental Impact Assessment of Coastal Ecosystem in Tamil Nadu, India with Hedonic and Travel Cost Models. International Journal of Marine Science, 66(636), 1-8.

Atkinson, S. C., Jupiter, S. D., Adams, V. M., Ingram, J. C., Narayan, S., Klein, C. J., & Possingham, H. P. (2016). Prioritising mangrove ecosystems services in spatially variable management priorities. *PLOS ONE*, 11(3), 21.

Ayanlade, A., & Proske, U. (2015). Assessing wetland degradation and loss of ecosystem services in the Niger Delta, Nigeria. *Marine and Freshwater Research*, 828–836.

Aziz, A. A., Dargusch, P., Phinn, S., & Ward, A. (2015). Using REDD plus to balance timber production with conservation objectives in a mangrove forest in Malaysia. *Ecological Economics,* 120, 108–116.

Barbier, E. B. (2007). Valuing ecosystem services as productive inputs. *Economic Policy*, 22(49), 178–229.

Barbier, E. B. (2012). A spatial model of coastal ecosystem services. *Ecological Economics*, 78, 70–79.

Barbier, E., & Hacker, S. D. (2011). The value of estuarine and coastal ecosystem services. *Ecological Monographs*, 81(2), 169–193.

Beaumont, N. J., Jones, L., Garbutt, A., Hansom, J. D., & Toberman, M. (2014). The value of carbon sequestration and storage in coastal habitats. *Estuarine, Coastal and Shelf* *Science*, 137, 32–40.

Blandon, A., & Zu Ermgassen, P. S. E. (2014). Quantitative estimate of commercial fish enhancement by seagrass habitat in southern Australia. *Estuarine, Coastal and Shelf Science*, 141, 1–8.

Börger, T., & Piwowarczyk, J. (2016). Assessing Non-market Benefits of Seagrass Restoration in the Gulf of Gdańsk. *Journal of Ocean and Coastal Economics*, 3(1).

Brander, L. M., Wagtendonk, A. J., Hussain, S. S., McVittie, A., Verburg, P. H., de Groot, R. S., … van der Ploeg, S. (2012). Ecosystem service values for mangroves in Southeast Asia: A meta-analysis and value transfer application. *Ecosystem Services*, 1(1), 62–69.

Brenner, J., Jiménez, J. A., Sardá, R., & Garola, A. (2010). An assessment of the non-market value of the ecosystem services provided by the Catalan coastal zone, Spain. *Ocean & Coastal Management*, 53(1), 27–38.

Brown, A., & Shi, P. (2014). Valuing the Economic Benefits of Florida’s Conservation Lands. Master’s thesis, Nicholas School of the Environment, Duke University: Durham, North Carolina.

Burgess, P., Li, X., & Qin, S. (2015). Mangroves in Ecuador: An application and comparison of ecosystem service models, 59. Retrieved June 20, 2017 from http://dukespace.lib.duke.edu/dspace/handle/10161/9597.

Camacho Valdez, V., Ruiz-Luna, A., & Berlanga-Robles A, C. (2016). Effects of Land Use Changes on Ecosystem Services Value Provided By Coastal Wetlands: Recent and Future Landscape Scenarios. *Journal of Coastal Zone Management*, 19(1), 1000418.

Campagne, C. S., Salles, J.-M., Boissery, P., & Deter, J. (2015). The seagrass *Posidonia oceanica*: Ecosystem services identification and economic evaluation of goods and benefits. *Marine Pollution Bulletin*, 97(1), 391–400.

Chow, J. (2015). Spatially Explicit Evaluation of Local Extractive Benefits from Mangrove Plantations in Bangladesh. *Journal of Sustainable Forestry*, 34(6–7), 651–681.

Christensen, S. M., Tarp, P., & Hjortso, C. N. (2008). Mangrove forest management planning in coastal buffer and conservation zones, Vietnam: A multimethodological approach incorporating multiple stakeholders. Ocean & Coastal Management, 51(10), 712–726.

Clark, S., Grossman, T., Przyuski, N., Shinn, C., & Storz, D. (2012). Ecosystem-based Adaptation to Climate Change: A Cost-Benefit Analysis. Master's thesis, University of California at Santa Barbara.

Clavelle, T., & Jylkka, Z. (2013). Ecosystem Service Valuation of Proposed Protected Areas in Abaco, The Bahamas. Sustainable Fisheries Group, University of California, Santa Barbara.

Cooper, P., Hunt, A., Anneboina, L., Hutniczak, B., Munch, A., Goulding, I., Onofri, L Nunes, P, Luisetti, T., Turner, K., and Jackson, E. (2012). Deliverable 4.3 Assessment of Future Benefits Index to Documentation. Produced as part of the KnowSeas: Knowledge-based Sustainable Management for Europe’s Seas project funded by the European Commission.

Das, S. and A. Crepin (2013). Mangroves can provide against wind damage during storms. *Estuar. Coast. Shelf Sci.*, 134 (2013), pp. 98-107.

Defiesta, G. D. (2007). Indirect Use of Values of Oil-Spill Affected Mangroves in Guimaras Island. Proceedings of the 10th National Convention on Statistics, 1-2 October 2007, EDSA Shangri-La Hotel.

Dehghani, M., Farshchi, P., Danekar, A., Karami, M., & Aleshikh, A. A. A. (2010). Recreation Value of Hara Biosphere Reserve using Willingness-to-pay method. International *Journal of Environmental Research*, 4(2), 271–280.

Emerton, L., & Aung, Y. M. (2013). The Economic Value of Forest Ecosystem Services in Myanmar and Options for Sustainable Financing. IMG, Yangon and Ministry of Environmental Conservation and Forests: Nay Pyi Daw.

Engeman, R. M., Duquesnel, J. a., Cowan, E. M., Smith, H. T., Shwiff, S. a., & Karlin, M. (2008). Assessing Boat Damage to Seagrass Bed Habitat in a Florida Park from a Bioeconomics Perspective. *Journal of Coastal Research*, 242, 527–532.

Eppink, F., Brander, L., & Wagtendonk, A. (2014). An Initial Assessment of the Economic Value of Coastal and Freshwater Wetlands in West Asia. *Land*, 3(3), 557–573.

Everard, M., Jha, R. R., & Russell, S. (2014). The benefits of fringing mangrove systems to Mumbai. *Aquatic Conservation: Marine and Freshwater Ecosystems*, 24(2), 256–274.

Failler, P., Petre, E., Binet, T., & Marechal, J.-P. (2015). Valuation of marine and coastal ecosystem services as a tool for conservation: The case of Martinique in the Caribbean. *Ecosystem Services*, 11, 67–75.

Feagin, R. A., Martinez, M. L., Mendoza-Gonzalez, G., & Costanza, R. (2010). Salt marsh zonal migration and ecosystem service change in response to global sea level rise: A case study from an urban region. *Ecology & Society*, 15(4), 1–15.

Flores, L. P. (2012). Ecosystem Service Valuation: Opportunities for Increased Protection and Conservation in Clallam County, WA. Master’s thesis, The Evergreen State College: Olympia, Washington, USA. Retrieved June 20, 2017 from http://archives.evergreen.edu/masterstheses/Accession86-10MES/Flores_L-thesis2012.pdf

Fulford, R., Yoskowitz, D., Russell, M., Dantin, D., & Rogers, J. (2016). Habitat and recreational fishing opportunity in Tampa Bay: Linking ecological and ecosystem services to human beneficiaries. *Ecosystem Services*, 17, 64–74.

Garrard, S. L., & Beaumont, N. J. (2014). The effect of ocean acidification on carbon storage and sequestration in seagrass beds; a global and UK context. *Marine Pollution Bulletin*, 86(1–2), 138–146.

Gunawardena, U. P. (2009). Valuation of Ecosystem Services of Kala Oya River Basin: Implications for River Basin Management. *Vidyodaya Jounal of Humanities and Social Science*, Joint Golden Jubilee Issue of Vidyodaya, 239–266. Retrieved June 20, 2017 from hdl.handle.net/123456789/938.

Han, Q., Huang, X., Shi, P., & Zhang, J. (2008). Seagrass Bed Ecosystem Service Valuation: A Case Research on Hepu Seagrass Bed in Guangxi Province. *Marine Science Bulletin*, 10(1), 87–96.

Hoberg, J. (2011). Economic Analysis of Mangrove Forests: A case study in Gazi Bay, Kenya. UNEP. Retrieved June 20, 2017 from http://bluecarbonportal.org/wp-content/uploads/downloads/2012/09/UNEP_Economic-Analysis-of-Mangrove-Forests_Case-Study-in-Gazi-Bay_Sept2011.pdf

Huang, X. (2008). National report on seagrass in the South China Sea-China. South China Sea Institute of Oceanology, *Chinese Academy of Sciences*, Guangzhou, China, 37.

Hussain, S. A., & Badola, R. (2008). Valuing mangrove ecosystem services: Linking nutrient retention function of mangrove forests to enhanced agroecosystem production. Wetlands Ecology and Management, 16(6), 441–450.

Hussain, S. A., & Badola, R. (2010). Valuing mangrove benefits: Contribution of mangrove forests to local livelihoods in Bhitarkanika Conservation Area, East Coast of India. *Wetlands Ecology and Management*, 18(3), 321–331.

Huxham, M., Emerton, L., Kairo, J., Munyi, F., Abdirizak, H., Muriuki, T., Nunan, F., and Briers, R. A. (2015). Applying Climate Compatible Development and economic valuation to coastal management: A case study of Kenya’s mangrove forests. *Journal of Environmental Management*, 157, 168–181.

Hynes, S., Norton, D., & Hanley, N. (2012). Accounting for Cultural Dimensions in Estimating the Value of Coastal Zone Ecosystem Services using International Benefit Transfer. No. Working Paper 12-WP-SEMRU-01, Socio-Economic Marine Research Unit, National University of Ireland: Galway, Ireland.

Interwies, E., & Gorlitz, S. (2013). Economic and social valuation of the CCLME ecosystem services. Protection of the Canary Current Large Marine Ecosystem (CCLME) Project – GCP/INT/023/GFF.

Islam, M. S., & Ikejima, K. (2010). Gear type, species composition and economic value of fisheries in the mangroves of Pak Phanang, Thailand. *Wetlands Ecology and Management*, 18(1), 27–36.

Jackson, E. L., Rees, S. E., Wilding, C., & Attrill, M. J. (2015). Use of a seagrass residency index to apportion commercial fishery landing values and recreation fisheries expenditure to seagrass habitat service. *Conservation Biology*, 29(3), 899–909.

Janekarnkij, P. (2010). Assessing the value of Krabi River Estuary Ramsar Site conservation and development. ARE Working Paper No. No. 2553/4, Department of Agricultural and Resource Economics, Faculty of Economics, Kasetsart University: Bangkok, Thailand. Retrieved from http://agri.eco.ku.ac.th/RePEc/kau/wpaper/are201004.pdf.

Jerath, M. (2012). An Economic Analysis of Carbon Sequestration and Storage Service by Mangrove Forests in Everglades National Park, Florida. FIU Electronic Theses and Dissertations, 702. Florida International University: Miami, Florida. Retrieved June 20, 2017 from http://digitalcommons.fiu.edu/etd/702.

Jerath, M., Bhat, M., Rivera-Monroy, V. H., Castaneda-Moya, E., Simard, M., & Twilley, R. R. (2016). The role of economic, policy, and ecological factors in estimating the value of carbon stocks in Everglades mangrove forests, South Florida, USA. *Environmental Science & Policy*, 66, 160-169.

Jordan, S. J., O’Higgins, T., & Dittmar, J. A. (2012). Ecosystem Services of Coastal Habitats and Fisheries: Multiscale Ecological and Economic Models in Support of Ecosystem-Based Management. *Marine and Coastal Fisheries*, 4(February 2015), 573–586.

Kairo, J. G., Wanjiru, C., & Ochiewo, J. (2009). Net Pay: Economic Analysis of a Replanted Mangrove Plantation in Kenya. *Journal of Sustainable Forestry*, 28(November), 395–414.

Kallesoe, M., Bambaradeniya, C., Ali Iftikhar, U., Ranasinghe, T., and Miththapala, S. (2008). Linking coastal ecosystems and human well-being: Learning from conceptual frameworks and empirical results. Gland, Switzerland: IUCN.

Kamimura, Y., Kasai, A., & Shoji, J. (2011). Production and prey source of juvenile black rockfish *Sebastes cheni* in a seagrass and macroalgal bed in the Seto Inland Sea, Japan: estimation of the economic value of a nursery. *Aquatic Ecology*, 45(3), 367–376.

Khaleel, K. M. (2012). Study on the Socio-Economic Influence of the Mangrove Wetlands of North Malabar (Kerala), India. *European Journal of Applied Sciences*, 4(6), 253–256.

Khaleel, K. M., Jaleel, C. A., & Jaleel, C. A. (2009). Environmental challenges to the mangrove wetlands of North Malabar (Kerala), India: Their sustainable development and influence on local people. *Knowledge and Management of Aquatic Ecosystems*, (392), 3.

Korovulavula, I., O ’garra, T., Fong, P., Ratuniata, R., & Mckay, K. (2008). Final Report Economic Valuation Iqoliqoli - Tourism Study Support (COMPONENT 2A - Project 2A2 Knowledge, monitoring, management and beneficial use of coral reef ecosystems No. Coral Reef Initiatives for the Pacific). Noumea, New Caledonia: Coral Reef Initiatives for the Pacific. Retrieved June 20, 2017 from https://spccfpstore1.blob.core.windows.net/digitallibrary-docs/files/ab/ab57e3a4f53da3feb0a0fa273d949057.pdf?sv=2015-04-05&sr=b&sig=%2FvYCYECioc3zdYqh77hgX3MdBZHYXo17CHCg5uDqaTc%3D&se=2016-06-27T11%3A58%3A33Z&sp=r&rscc=public%2C max-age%3D864000%2C max-st

Kuenzer, C., & Tuan, V. Q. (2013). Assessing the ecosystem services value of Can Gio Mangrove Biosphere Reserve: Combining earth observation and household survey based analyses. *Applied Geography*, 45, 167–184.

Lavery, P. S., Mateo, M.-N. M.-A., Serrano, O., & Rozaimi, M. (2013). Variability in the Carbon Storage of Seagrass Habitats and Its Implications for Global Estimates of Blue Carbon Ecosystem Service. *PLOS ONE*, 8(9).

Lavery, P. S., Mateo, M.-N. M.-A., Serrano, O., & Rozaimi, M. (2013). Variability in the Carbon Storage of Seagrass Habitats and Its Implications for Global Estimates of Blue Carbon Ecosystem Service. *PLOS ONE*, 8(9).

MacDonald, D. H., Ardeshiri, A., Rose, J. M., Russell, B. D., & Connell, S. D. (2015). Valuing coastal water quality: Adelaide, South Australia metropolitan area. *Marine Policy*, 52, 116–124.

Malik, A., Fensholt, R., & Mertz, O. (2015). Economic Valuation of Mangroves for Comparison with Commercial Aquaculture in South Sulawesi, Indonesia. *Forests*, 6(9), 3028–3044.

Mashayekhi, Z., Danehkar, A., Sharzehi, G. A., & Majed, V. (2016). Coastal Communities WTA Compensation for conservation of mangrove forests: a choice experiment approach. Knowledge and Management of Aquatic Ecosystems 417,20.

Mendoza-González, G., Martínez, M.L., Lithgow, D., Pérez-Maqueo, O. and Simonin, P. (2012). Land use change and its effects on the value of ecosystem services along the coast of the Gulf of Mexico. *Ecological Economics*, 82, pp.23-32.

Minello, T. J., Rozas, L. P., Caldwell, P. A., & Liese, C. (2012). A comparison of salt marsh construction costs with the value of exported shrimp production. *Wetlands*, 32(5), 791–799.

Mojiol, A. R., Guntabid, J., Lintangah, W., Ismenyah, M., Kodoh, J., Chiang, L. K., & Sompud, J. (2016). Contribution of Mangrove Forest and Socio-Economic Development of Local Communities in Kudat District, Sabah Malaysia. *International Journal of Agriculture, Forestry and Plantation*, 2(2), 122–129.

Mubarak Bin Daina, M., Khamis, A., Alqassim Abdulrazzaq, M., Sattout, E., Alkhuzai, J., Alhusseini, M. T., & Husain, E. (2015). An Assessment and Mapping of the Potential Values of Ecosystem Services in the Kingdom of Bahrain (Project report for the UNEP and GEF project “*Updating the National Biodiversity Strategy and Action Plan of the Kingdom of Bahrain*”). Retrieved June 20, 2017 from http://www.biodiv.be/bahrain/implementation/bahrain-nbsap/bahrain-nbsap-2015/assessment-and-mapping-potential-value-ecosystem-services-kingdom-bahrain-dr/download/en/1/An Assessment and Mapping of Potenital Values of Ecosystem Services in Bahrain Final_v6_Abdulla_20151125 (Received 201215).pdf

O’Garra, T. (2012). Economic valuation of a traditional fishing ground on the coral coast in Fiji. *Ocean & Coastal Management*, 56, 44–55.

O’Higgins, Timothy G.; Ferraro, Steven P.; Dantin, Darrin D.; Jordan, Stephen J.; Chintala, M. M. (2010). Habitat Scale Mapping of Fisheries Ecosystem Service Values in Estuaries. *Ecology and Society*, 15.

Oleson, K. L. L., Barnes, M., Brander, L. M., Oliver, T. A., van Beek, I., Zafindrasilivonona, B., & van Beukering, P. (2015). Cultural bequest values for ecosystem service flows among indigenous fishers: A discrete choice experiment validated with mixed methods. *Ecological Economics*, 114, 104–116.

Otieno, P. (2015). Linking economic values of mangrove ecosystems with the governing institutional framework for sustainable management of the Tana Delta, Kenya. Ph.D. dissertation, Advanced Studies in Environmental Law and Policy (CASELAP), University of Nairobi. Retrieved June 20, 2017 from http://erepository.uonbi.ac.ke/bitstream/handle/11295/93545/Otieno_linking economic values of mangrove ecosystems.pdf?sequence=3&isAllowed=y

Padilla, J. (2008). Chapter 5: Coastal and Marine Resources. In W. Bank (Ed.), *The Philippines: Country Environmental Analysis* (pp. 66-80). Washington, D.C.: World Bank, Sustainable Development Department, East Asia and Pacific Region. Retrieved June 20, 2017 from http://documents.worldbank.org/curated/en/381381468092951045/pdf/523890PH0white101OFFICIAL0USE0ONLY1.pdf.

Pandey, A. (2015). Diagnostic assessment of select environmental challenges: Valuation of biodiversity and ecosystem services in India. *Journal of Innovative Research and Solutions*, 1(1), 77–88.

Pascal, N., & Bulu, M. (2013). Economic valuation of mangrove ecosystem services, Vanuatu: Case study of Crab Bay (Malekula Is.) and Eratap (Efate Is.). Technical Report for Project Mescal, Mangrove EcoSystems for Climate Change Adaptation & Livelihoods. Suva, Fiji.

Patterson, M. G., & Cole, A. (2013). “Total economic value” of New Zealand’s land-based ecosystems and their services. In J. R. Dymond (Ed.), *Ecosystem services in New Zealand – conditions and trends*. Lincoln, New Zealand: Manaaki Whenua Press. Retrieved June 20, 2017 from https://www.landcareresearch.co.nz/__data/assets/pdf_file/0004/77062/3_2_Patterson.pdf.

Pernetta, J. C., Ong, J.-E., Padilla, N. E. O., Rahim, K. A., & Chinh, N. T. (2013). Determining regionally applicable economic values for coastal habitats and their use in evaluating the cost effectiveness of regional conservation actions: the example of mangroves, in the South China Sea. *Ocean & Coastal Management*, 85(B, SI), 177–185.

Quoc Vo, T., Kuenzer, C., Oppelt, N., Vo, T. Q., Kuenzer, C., & Oppelt, N. (2015). How remote sensing supports mangrove ecosystem service valuation: A case study in Ca Mau province, Vietnam. *Ecosystem Services*, 14, 67–75.

Reddy, S.M., Guannel, G., Griffin, R., Faries, J., Boucher, T., Thompson, M., Brenner, J., Bernhardt, J., Verutes, G., Wood, S.A. and Silver, J.A. (2016). Evaluating the role of coastal habitats and sea-level rise in hurricane risk mitigation: An ecological economic assessment method and application to a business decision. *Integrated Environmental Assessment and Management*, 12(2), 328–344.

Russell, M., & Greening, H. (2015). Estimating Benefits in a Recovering Estuary: Tampa Bay, Florida. *Estuaries and Coasts*, 38(1), S9–S18.

Samonte-Tan, G. P. B., White, A. T., Tercero, M. A., Diviva, J., Tabara, E., & Caballes, C. (2007). Economic Valuation of Coastal and Marine Resources: Bohol Marine Triangle, Philippines. *Coastal Management*, 35(2–3), 319–338.

Schmidt, J. P., Moore, R., & Alber, M. (2014). Integrating ecosystem services and local government finances into land use planning: A case study from coastal Georgia. *Landscape and Urban Planning*, 122, 56–67.

Sopheak, K., & Hoeurn, C. (2016). An estimation of the production function of fisheries in Peam Krasaob wildlife sanctuary in Koh Kong province, Cambodia. EEPSEA Research Report, (No.2016-RR5). Retrieved June 20, 2017 from https://www.cabdirect.org/cabdirect/abstract/20163271875.

Souza, F. E. S., & e Silva, C. A. (2011). Ecological and economic valuation of the Potengi estuary mangrove wetlands (NE, Brazil) using ancillary spatial data. *Journal of Coastal Conservation*, 15(1), 195–206.

Sun, X., Li, Y., Zhu, X., Cao, K., & Feng, L. (2015). Integrative assessment and management implications on ecosystem services loss of coastal wetlands due to reclamation. *Journal of Cleaner Production*.

Susilo, E., Purwanti, P., & Agung Lestariadi, R. (n.d.). Mangrove management in Damas beach: Economic and institutional analysis. *International Journal of Management and Administrative Sciences*, 3(8), 2225-722511.

Tuan, T. H., My, N. H. D., Anh, L. T. Q., & Toan, N. Van. (2014). Using contingent valuation method to estimate the WTP for mangrove restoration under the context of climate change: A case study of Thi Nai lagoon, Quy Nhon city, Vietnam. *Ocean & Coastal Management*, 95, 198–212.

Tuan, T. H., Van Xuan, M., Nam, D., & Navrud, S. (2009). Valuing direct use values of wetlands: A case study of Tam Giang-Cau Hai lagoon wetland in Vietnam. *Ocean & Coastal Management*, 52(2), 102-112.

Tuya, F., Haroun, R., & Espino, F. (2014). Economic assessment of ecosystem services: Monetary value of seagrass meadows for coastal fisheries. *Ocean & Coastal Management*, 96(0), 181–187.

Uddin, M. S., de Ruyter van Steveninck, E., Stuip, M., & Shah, M. A. R. (2013). Economic valuation of provisioning and cultural services of a protected mangrove ecosystem: A case study on Sundarbans Reserve Forest, Bangladesh. *Ecosystem Services*, 5, 88–93.

Ullah, M. H., Mondal, M. A. I., Uddin, M. R., & Ferdous, M. A. (2010). Implications of Mangrove Wetland in Socio-environmental Sector: Experiences from Southeast Coast of Chittagong, Bangladesh. *Journal of Forest and Environmental Science*, 26(2), 103–111.

Unsworth, R. K. F. F., Cullen, L. C., Pretty, J. N., Smith, D. J., & Bell, J. J. (2010). Economic and subsistence values of the standing stocks of seagrass fisheries: Potential benefits of no-fishing marine protected area management. *Ocean & Coastal Management*, 53(5–6), 218–224.

Vassallo, P., Paoli, C., Rovere, A., Montefalcone, M., Morri, C., and Bianchi, C. N. (2013). The value of the seagrass Posidonia oceanica: A natural capital assessment. *Marine Pollution Bulletin*, 75(1–2), 157–167.

Vazquez-Gonzalez, C., Moreno-Casasola, P., Juarez, A., Rivera-Guzman, N., Monroy, R., & Espejel, I. (2015). Trade-offs in fishery yield between wetland conservation and land conversion on the Gulf of Mexico. *Ocean & Coastal Management*, 114, 194–203.

Warren-Rhodes, K., Schwarz, A.-M., Boyle, L. N., Albert, J., Agalo, S. S., Warren, R., Bana, A., Paul, C., Kodosiku, R., Bosma, W., Yee, D., Ronnback, P., Crona, B., and Duke, N. (2011). Mangrove ecosystem services and the potential for carbon revenue programmes in Solomon Islands. *Environmental Conservation*, 38(4), 485–496.

Will, E. (2014). The use of ecosystem service valuation in environmental sensitivity analysis for ship- source oil spill preparedness and response planning in Chedabucto Bay, Nova Scotia. Master’s thesis, Dalhousie University: Halifax, Nova Scotia. Retrieved June 20, 2017 from https://dalspace.library.dal.ca/bitstream/handle/10222/56260/Will_E Graduate Project2014.pdf?sequence=1.

Witt, E. (2016). A Financial and Economic Assessment of the Conservation of Northwestern Madagascar Mangroves. Master's thesis, Nicholas School of the Environment, Duke University: Durham, North Carolina, USA. Retrieved June 20, 2017 from http://dukespace.lib.duke.edu/dspace/handle/10161/11911.

Wiwatthanapornchai, S., Piputsitee, C., & Boonyawat, S. (2014). The Economic Value of Laem Phak Bia Mangrove Ecosystem Services in Phetchaburi Province, Thailand. *Modern Applied Science*, 8(5), 36.

Yoskowitz, D., Carollo, C., Pollack, J. B., Santos, C., & Welder, K. (2016). Integrated ecosystem services assessment: Valuation of changes due to sea level rise in Galveston Bay, TX. *Integrated Environmental Assessment and Management*, 13.2, 431-443.

Zhiyun, O., Yu, J., Tongqian, Z., & Hua, Z. (2011). Ecosystem Regulating Services and their Valuation of Hainan Island, China. *Journal of Resources and Ecology*, 2(2), 132–140.

Zuidema, C., Plate, R., & Dikou, A. (2011). To preserve or to develop? East Bay dredging project, South Caicos, Turks and Caicos Islands. *Journal of Coastal Conservation*, 15(4), 555–563.
